# Supplementary material for: SERS-based immunoassay on a plasmonic syringe filter for improved sampling and labeling efficiency of biomarkers
Source: Royal Society of Chemistry journal article supplement (doi:10.1039/d3an01899g), 2023-11-21
Supplement: d3an01899g1.pdf [file d3an01899g1.pdf]

## Supporting Information for:

# SERS-based Immunoassay on a Plasmonic Syringe Filter for Improved Sampling and Labeling Efficiency of Biomarkers

Eunice Ebbah, Anthony Amissah, Jun-Hyun Kim\*, and Jeremy D. Driskell\*

*Department of Chemistry, Illinois State University, Normal, IL 61790*

\*corresponding authors: [jkim5@ilstu.edu](mailto:jkim5@ilstu.edu); [jdriske@ilstu.edu](mailto:jdriske@ilstu.edu)

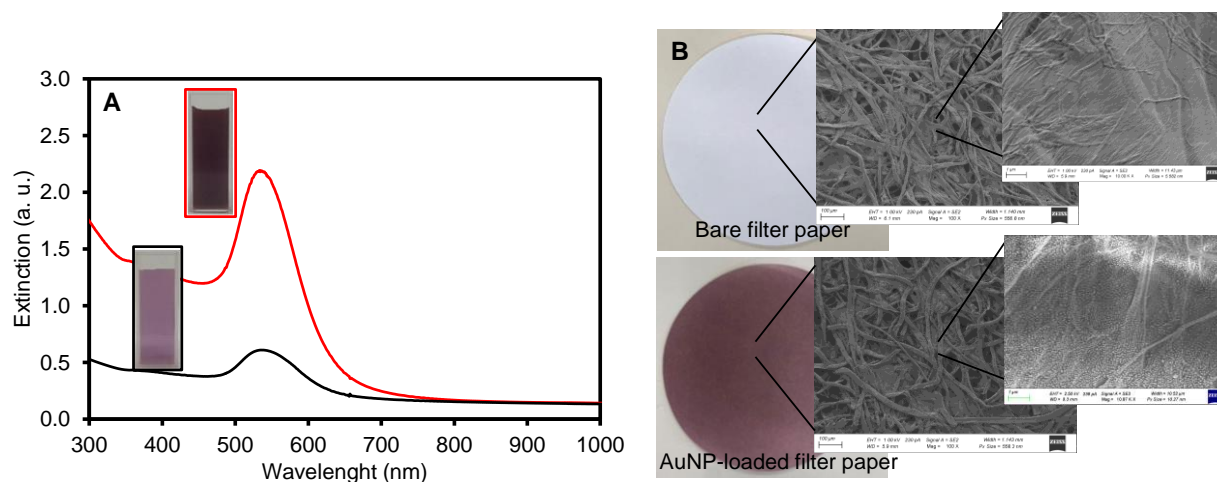

**Figure S1.** UV-Vis extinction spectra before (red) and after (black) loading of AuNPs onto Whatman grade 4 filter paper to form a plasmonic substrate (A) and corresponding photo and SEM images before and after the deposition of sphere AuNPs on the filter paper.

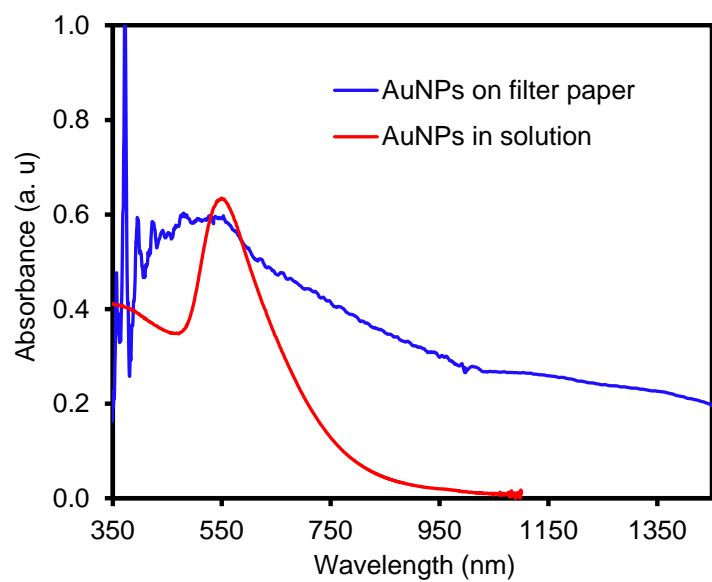

**Figure S2.** Absorption patterns of AuNPs on filter paper and in solution.

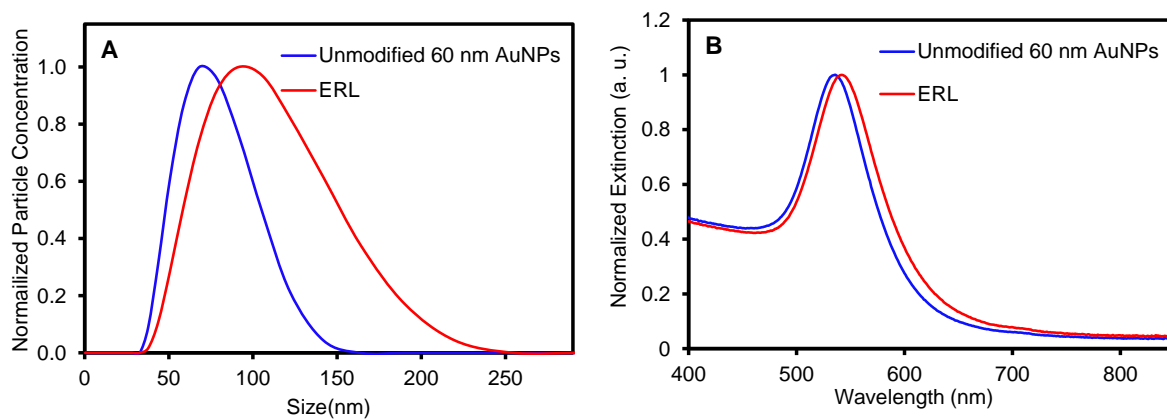

**Figure S3.** DLS size distribution (A) and extinction spectra (B) of unconjugated 60 nm AuNPs and ERLs.

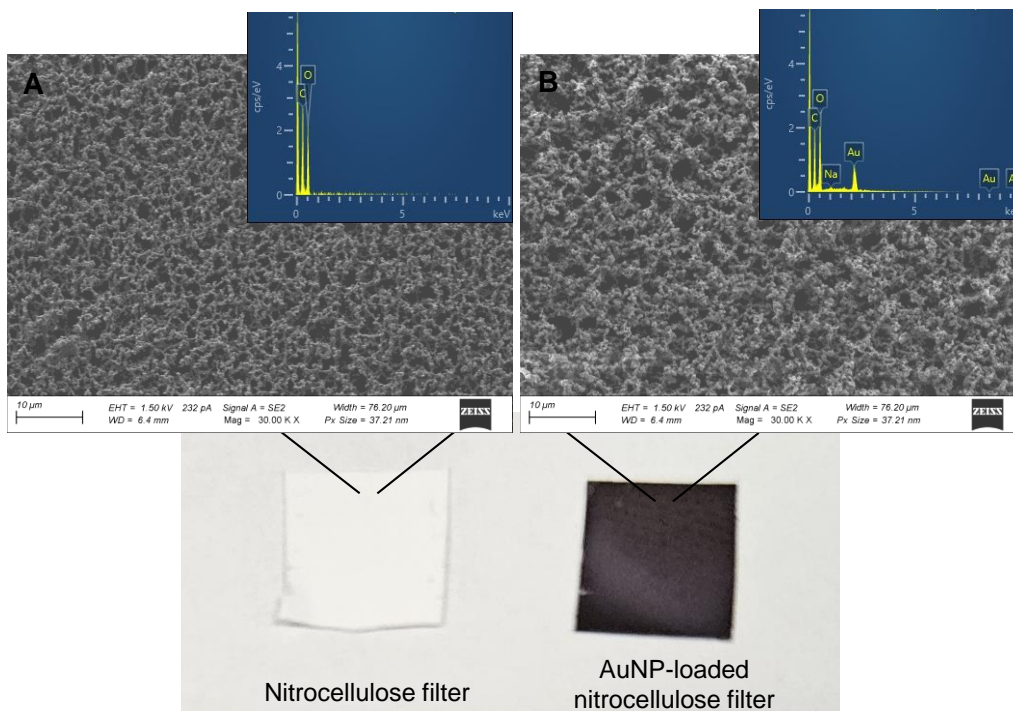

**Figure S4.** Digital photos, SEM images, and EDX spectra of bare (A) and AuNP-loaded nitrocellulose filter paper (note: EDX was obtained by Oxford AZtecLive Standard EDS System with Ultim Max 65 detector).

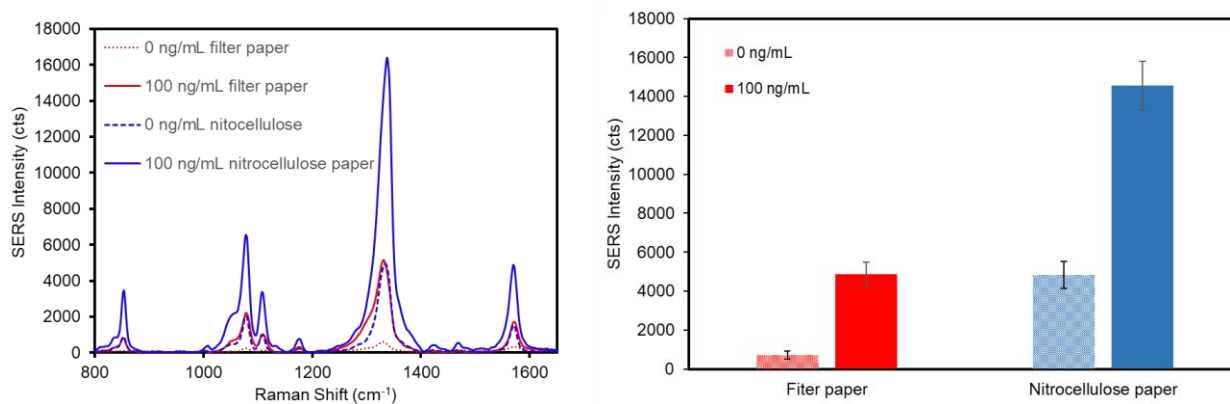

**Figure S5.** SERS spectra for positive and negative assays on AuNP-loaded filter paper and nitrocellulose paper (left). Average intensity of the SERS band at  $1338\text{ cm}^{-1}$  for positive and negative control samples (right).

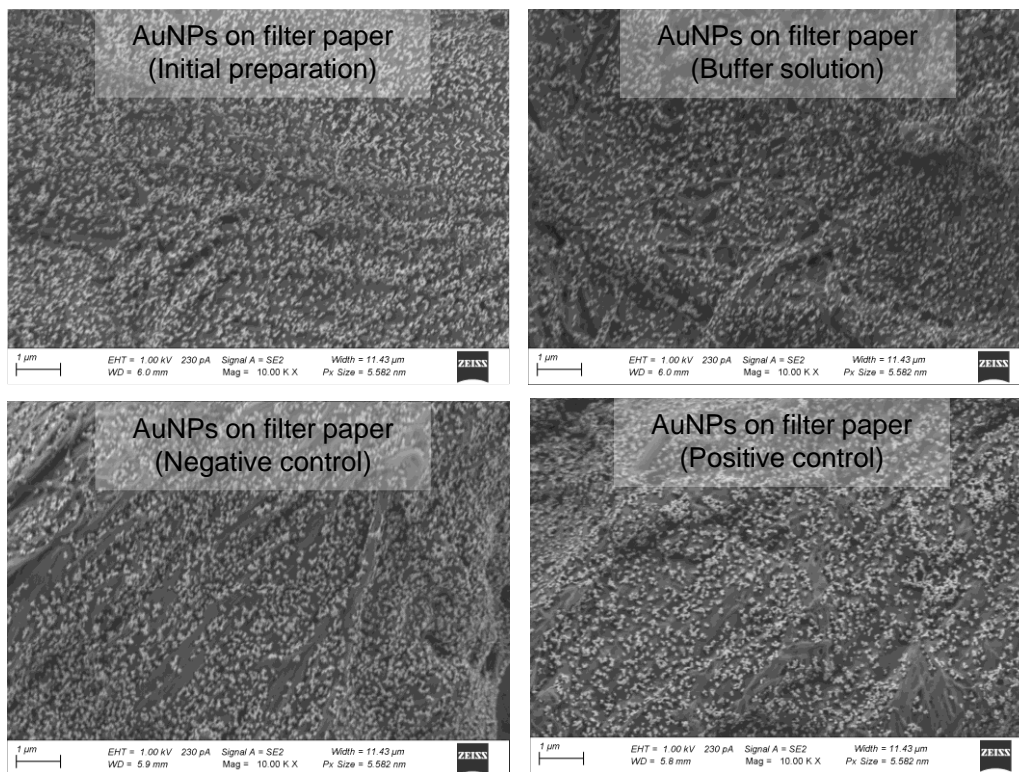

**Figure S6.** SEM images of AuNP-loaded filter paper as a function of sampling process using a syringe filter system.

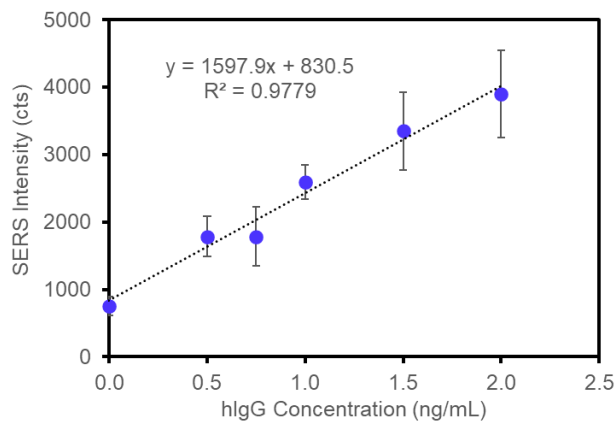

**Figure S7.** Calibration curve for the detection of human IgG in the low concentration range to determine the LOD.

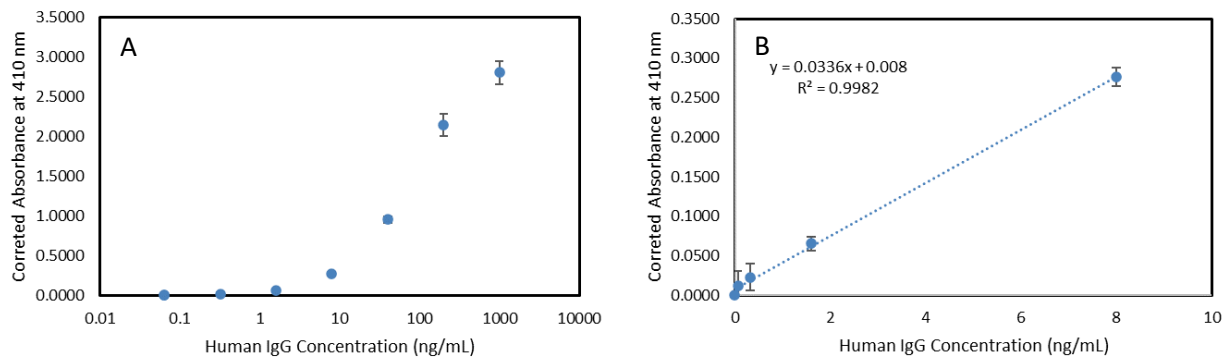

**Figure S8.** ELISA calibration curve for the detection of human IgG for a broad concentration range (A) and for the low concentration range to determine the LOD (B).
